# Supplementary material for: Discovery and characterization of novel Aspergillus fumigatus mycoviruses
Source: PubMed Central journal article supplement (PMC6059430; doi:10.1371/journal.pone.0200511), 2018-07-25
Supplement: pone.0200511.s001.pdf [file pone.0200511.s001.pdf]

| virus family      | virus genus      | virus species                                              | genomic (segment) RNA length (bp) | Accession number |
|-------------------|------------------|------------------------------------------------------------|-----------------------------------|------------------|
| Alphaflexiviridae | Botrexvirus      | Botrytis virus X                                           | 6966                              | NC_005132        |
|                   | Sclerodarnavirus | Sclerotinia sclerotiorum debilitation-associated RNA virus | 5470                              | NC_007415        |
| Deltaflexiviridae | Deltaflexivirus  | Fusarium graminearum deltaflexivirus 1                     | 8246                              | NC_030654        |
| Gammaflexiviridae | Mycoflexivirus   | Botrytis virus F                                           | 6827                              | NC_002604        |
| Barnaviridae      | Barnavirus       | Mushroom bacilliform virus                                 | 4009                              | NC_001633        |
|                   |                  | Rhizoctonia solani barnavirus 1                            | 3914                              | KP900904         |
| Chrysoviridae     | Chrysovirus      | Amasya cherry disease associated chrysovirus segment 1     | 3399                              | NC_009947        |
|                   |                  | Amasya cherry disease associated chrysovirus segment 2     | 3128                              | NC_009946        |
|                   |                  | Amasya cherry disease associated chrysovirus segment 3     | 2833                              | NC_009945        |
|                   |                  | Amasya cherry disease associated chrysovirus segment 4     | 2498                              | NC_009944        |
|                   |                  | Anthurium mosaic-associated virus RNA1                     | 3550                              | FJ899675         |
|                   |                  | Anthurium mosaic-associated virus RNA2                     | 3448                              | FJ899676         |
|                   |                  | Anthurium mosaic-associated virus RNA3                     | 3244                              | FJ899677         |
|                   |                  | Aspergillus fumigatus chrysovirus segment 1                | 3560                              | FN178512         |
|                   |                  | Aspergillus fumigatus chrysovirus segment 2                | 3159                              | FN178513         |
|                   |                  | Aspergillus fumigatus chrysovirus segment 3                | 3006                              | FN178514         |
|                   |                  | Aspergillus fumigatus chrysovirus segment 4                | 2863                              | FN178515         |
|                   |                  | Bipolaris maydis chrysovirus 1                             | 3617                              | KY489954         |
|                   |                  | Bipolaris maydis chrysovirus 2                             | 3123                              | KY489955         |
|                   |                  | Bipolaris maydis chrysovirus 3                             | 2984                              | KY489956         |
|                   |                  | Bipolaris maydis chrysovirus 4                             | 2753                              | KY489957         |
|                   |                  | Botryosphaeria dothidea chrysovirus 1 RNA 1                | 3654                              | KF688736         |
|                   |                  | Botryosphaeria dothidea chrysovirus 1 RNA 2                | 2773                              | KF688737         |
|                   |                  | Botryosphaeria dothidea chrysovirus 1 RNA 3                | 2597                              | KF688738         |
|                   |                  | Botryosphaeria dothidea chrysovirus 1 RNA 4                | 2574                              | KF688739         |
|                   |                  | Botryosphaeria dothidea chrysovirus 1 segment 1            | 3528                              | NC_034268        |
|                   |                  | Botryosphaeria dothidea chrysovirus 1 segment 2            | 2816                              | NC_034271        |
|                   |                  | Botryosphaeria dothidea chrysovirus 1 segment 3            | 2583                              | NC_034269        |
|                   |                  | Botryosphaeria dothidea chrysovirus 1 segment 4            | 2574                              | NC_034270        |
|                   |                  | Botryosphaeria dothidea chrysovirus RNA 1                  | 3655                              | KJ573505         |
|                   |                  | Botryosphaeria dothidea chrysovirus RNA 2                  | 2825                              | KJ573506         |
|                   |                  | Botryosphaeria dothidea chrysovirus RNA 3                  | 2596                              | KJ573507         |
|                   |                  | Botryosphaeria dothidea chrysovirus RNA 4                  | 2575                              | KJ573508         |
|                   |                  | Brassica campestris chrysovirus 1 RNA 1                    | 3639                              | KP782031         |
|                   |                  | Brassica campestris chrysovirus 1 RNA 2                    | 3567                              | KP782030         |
|                   |                  | Brassica campestris chrysovirus 1 RNA 3                    | 3337                              | KP782029         |
|                   |                  | Colletotrichum gloeosporioides chrysovirus 1 segment 1     | 3397                              | KT581957         |
|                   |                  | Colletotrichum gloeosporioides chrysovirus 1 segment 2     | 2869                              | KT581958         |

| virus family | virus genus | virus species                                           | genomic (segment) RNA length (bp) | Accession number |
|--------------|-------------|---------------------------------------------------------|-----------------------------------|------------------|
|              |             | Colletotrichum gloeosporioides chrysovirus 1 segment 3  | 2630                              | KT581959         |
|              |             | Cryphonectria nitschkei chrysovirus 1 BS122 CP          | 2980                              | GQ290645         |
|              |             | Cryphonectria nitschkei chrysovirus 1 BS122 RdRp        | 2978                              | GQ290649         |
|              |             | Cryphonectria nitschkei chrysovirus 1 BS131 CP          | 2718                              | GQ290646         |
|              |             | Cryphonectria nitschkei chrysovirus 1 BS131 RdRp        | 2889                              | GQ290650         |
|              |             | Cryphonectria nitschkei chrysovirus 1 BS132 CP          | 2718                              | GQ290647         |
|              |             | Cryphonectria nitschkei chrysovirus 1 BS132 RdRp        | 2889                              | GQ290651         |
|              |             | Cryphonectria nitschkei chrysovirus 1 BS321 CP          | 2721                              | GQ290648         |
|              |             | Cryphonectria nitschkei chrysovirus 1 BS321 RdRp        | 2889                              | GQ290652         |
|              |             | Cryphonectria nitschkei chrysovirus 1 segment 1         | 2960                              | HM013826         |
|              |             | Cryphonectria nitschkei chrysovirus 1 segment 2         | 2552                              | HM013825         |
|              |             | Fusarium oxysporum f. sp. dianthi mycovirus 1 segment 1 | 3555                              | NC_027563        |
|              |             | Fusarium oxysporum f. sp. dianthi mycovirus 1 segment 2 | 2809                              | NC_027564        |
|              |             | Fusarium oxysporum f. sp. dianthi mycovirus 1 segment 3 | 2794                              | NC_027565        |
|              |             | Fusarium oxysporum f. sp. dianthi mycovirus 1 segment 4 | 2646                              | NC_027566        |
|              |             | Grapevine chrysovirus protease                          | 2762                              | JX658567         |
|              |             | Helminthosporium victoriae 145S virus RNA 1             | 3612                              | NC_005978        |
|              |             | Helminthosporium victoriae 145S virus RNA 2             | 3134                              | NC_005979        |
|              |             | Helminthosporium victoriae 145S virus RNA 3             | 3972                              | NC_005980        |
|              |             | Helminthosporium victoriae 145S virus RNA 4             | 2763                              | NC_005981        |
|              |             | Isaria javanica chrysovirus 1 segment 1                 | 3593                              | NC_033277        |
|              |             | Isaria javanica chrysovirus 1 segment 2                 | 3175                              | NC_033317        |
|              |             | Isaria javanica chrysovirus 1 segment 3                 | 3165                              | NC_033318        |
|              |             | Isaria javanica chrysovirus 1 segment 4                 | 2874                              | NC_033278        |
|              |             | La France disease virus ORF1                            | 503                               | U62640           |
|              |             | La France disease virus ORF1                            | 1101                              | U62643           |
|              |             | La France disease virus pL3 gene                        | 2778                              | D10830           |
|              |             | La France disease virus pM1 gene                        | 1407                              | D10829           |
|              |             | La France disease virus pM2 gene                        | 1307                              | D10828           |
|              |             | Macrophomina phaseolina chrysovirus 1 RNA 1             | 3712                              | KP900886         |
|              |             | Macrophomina phaseolina chrysovirus 1 RNA 2             | 3462                              | KP900887         |
|              |             | Macrophomina phaseolina chrysovirus 1 RNA 3             | 2985                              | KP900889         |
|              |             | Macrophomina phaseolina chrysovirus 1 RNA 4             | 2927                              | KP900888         |
|              |             | Magnaporthe oryzae chrysovirus 1 segment 1              | 3554                              | NC_014462        |
|              |             | Magnaporthe oryzae chrysovirus 1 segment 2              | 3250                              | NC_014465        |
|              |             | Magnaporthe oryzae chrysovirus 1 segment 3              | 3074                              | NC_014463        |
|              |             | Magnaporthe oryzae chrysovirus 1 segment 4              | 3043                              | NC_014464        |
|              |             | Magnaporthe oryzae chrysovirus 1 segment 5              | 2879                              | AB700631         |

| virus family   | virus genus       | virus species                                | genomic (segment) RNA length (bp) | Accession number |
|----------------|-------------------|----------------------------------------------|-----------------------------------|------------------|
|                |                   | Magnaporthe oryzae chrysovirus 3 RNA 1       | 3558                              | NC_023041        |
|                |                   | Magnaporthe oryzae chrysovirus 3 RNA 2       | 3254                              | NC_023042        |
|                |                   | Magnaporthe oryzae chrysovirus 3 RNA 3       | 2997                              | NC_023039        |
|                |                   | Magnaporthe oryzae chrysovirus 3 RNA 4       | 2880                              | NC_023040        |
|                |                   | Magnaporthe oryzae chrysovirus 3 RNA 5       | 2874                              | NC_023043        |
|                |                   | Penicillium chrysogenum virus segment 1      | 3562                              | NC_007539        |
|                |                   | Penicillium chrysogenum virus segment 2      | 3200                              | NC_007540        |
|                |                   | Penicillium chrysogenum virus segment 3      | 2976                              | NC_007541        |
|                |                   | Penicillium chrysogenum virus segment 4      | 2902                              | NC_007542        |
|                |                   | Penicillium janczewskii chrysovirus 1 RNA 1  | 3698                              | NC_028495        |
|                |                   | Penicillium janczewskii chrysovirus 1 RNA 2  | 2899                              | NC_028500        |
|                |                   | Penicillium janczewskii chrysovirus 1 RNA 3  | 2942                              | NC_028496        |
|                |                   | Penicillium janczewskii chrysovirus 1 RNA 4  | 2506                              | NC_028497        |
|                |                   | Penicillium janczewskii chrysovirus 2 RNA 1  | 3540                              | KT950836         |
|                |                   | Penicillium janczewskii chrysovirus 2 RNA 2  | 2699                              | KT950837         |
|                |                   | Penicillium janczewskii chrysovirus 2 RNA 3  | 2535                              | KT950838         |
|                |                   | Persea americana chrysovirus RNA 1           | 3421                              | KJ418374         |
|                |                   | Persea americana chrysovirus RNA 2           | 3335                              | KJ418375         |
|                |                   | Persea americana chrysovirus RNA 3           | 2857                              | KJ418376         |
|                |                   | Raphanus sativas chrysovirus 1 RNA 1         | 3638                              | JQ045335         |
|                |                   | Raphanus sativas chrysovirus 1 RNA 2         | 3517                              | JQ045336         |
|                |                   | Raphanus sativas chrysovirus 1 RNA 3         | 3299                              | JQ045337         |
|                |                   | Verticillium dahliae chrysovirus 1 segment 1 | 3594                              | HM004067         |
|                |                   | Verticillium dahliae chrysovirus 1 segment 2 | 3313                              | HM004068         |
|                |                   | Verticillium dahliae chrysovirus 1 segment 3 | 2983                              | HM004069         |
|                |                   | Verticillium dahliae chrysovirus 1 segment 4 | 2932                              | HM004070         |
| Endornaviridae | Alphaendornavirus | Basella alba alphaendornavirus 1             | 14027                             | AB844264         |
|                |                   | Basella alba alphaendornavirus 1             | 14027                             | AB844265         |
|                |                   | Bell pepper endornavirus                     | 14727                             | AB597230         |
|                |                   | Bell pepper endornavirus                     | 14729                             | KT149366         |
|                |                   | Bell pepper endornavirus                     | 14728                             | NC_015781        |
|                |                   | Bell pepper endornavirus                     | 14727                             | JQ951943         |
|                |                   | Bell pepper endornavirus                     | 14727                             | KF709944         |
|                |                   | Bell pepper endornavirus                     | 14659                             | KP455654         |
|                |                   | Bell pepper endornavirus                     | 14727                             | KX977568         |
|                |                   | Bell pepper endornavirus                     | 14714                             | KX977569         |
|                |                   | Cucumis melo endornavirus                    | 15079                             | KX641269         |
|                |                   | Cucumis melo endornavirus                    | 15078                             | NC_029064        |

| virus family | virus genus      | virus species                               | genomic (segment) RNA length (bp) | Accession number |
|--------------|------------------|---------------------------------------------|-----------------------------------|------------------|
|              |                  | Erysiphe cichoracearum endornavirus         | 11907                             | NC_029095        |
|              |                  | Grapevine endophyte endornavirus            | 12154                             | NC_019493        |
|              |                  | Helicobasidium mompa endornavirus 1         | 16614                             | NC_013447        |
|              |                  | Hordeum vulgare endornavirus                | 14243                             | NC_028949        |
|              |                  | Hot pepper endornavirus                     | 14729                             | NC_027920        |
|              |                  | Lagenaria siceraria endornavirus-California | 15088                             | NC_023641        |
|              |                  | Oryza rufipogon endornavirus                | 13936                             | NC_007649        |
|              |                  | Oryza sativa endornavirus                   | 13952                             | NC_007647        |
|              |                  | Persea americana alphaendornavirus 1        | 13459                             | NC_016648        |
|              |                  | Phaseolus vulgaris endornavirus 1           | 14072                             | KT456287         |
|              |                  | Phaseolus vulgaris endornavirus 1           | 13908                             | NC_023678        |
|              |                  | Phaseolus vulgaris endornavirus 2           | 14820                             | AB719398         |
|              |                  | Phaseolus vulgaris endornavirus 2           | 14817                             | KT456288         |
|              |                  | Phytophthora endornavirus 1                 | 13883                             | NC_007069        |
|              |                  | Rhizoctonia cerealis endornavirus 1         | 17486                             | NC_022619        |
|              |                  | Vicia faba endornavirus                     | 17635                             | NC_007648        |
|              |                  | Yerba mate endornavirus                     | 13954                             | NC_024455        |
|              | Betaendornavirus | Alternaria brassicicola endornavirus 1      | 10290                             | NC_026136        |
|              |                  | Gremmeniella abietina type B RNA virus XL1  | 10375                             | NC_007920        |
|              |                  | Sclerotinia sclerotiorum endornavirus 2     | 10520                             | KU299046         |
|              |                  | Sclerotinia sclerotiorum endornavirus 2     | 10513                             | NC_023893        |
|              |                  | Tuber aestivum endornavirus                 | 9760                              | NC_014904        |
|              | unclassified     | Botrytis cinerea endornavirus 1             | 11557                             | NC_031752        |
|              |                  | Ceratobasidium endornavirus A               | 15207                             | NC_031462        |
|              |                  | Ceratobasidium endornavirus B               | 23635                             | NC_031463        |
|              |                  | Ceratobasidium endornavirus C               | 21004                             | NC_031461        |
|              |                  | Ceratobasidium endornavirus D               | 19406                             | NC_031449        |
|              |                  | Ceratobasidium endornavirus G               | 19293                             | NC_031464        |
|              |                  | Lagenaria siceraria endornavirus-Hubei      | 15098                             | NC_034216        |
|              |                  | Psophocarpus tetragonolobus endornavirus    | 14623                             | NC_031336        |
|              |                  | Rhizoctonia solani endornavirus 2           | 15850                             | KT823701         |
|              |                  | Rosellinia necatrix endornavirus 1          | 9639                              | NC_030938        |
|              |                  | Sclerotinia sclerotiorum endornavirus-1     | 10580                             | KM923990         |
|              |                  | Sclerotinia sclerotiorum endornavirus-1     | 10770                             | NC_021706        |
| Hypoviridae  | Hypovirus        | Cryphonectria hypovirus 1                   | 12727                             | AF082191         |
|              |                  | Cryphonectria hypovirus 1                   | 12724                             | DQ861913         |
|              |                  | Cryphonectria hypovirus 1                   | 3234                              | HM246637         |
|              |                  | Cryphonectria hypovirus 1                   | 3231                              | HM246638         |

| virus family | virus genus | virus species                        | genomic (segment) RNA length (bp) | Accession number |
|--------------|-------------|--------------------------------------|-----------------------------------|------------------|
|              |             | Cryphonectria hypovirus 1            | 3237                              | HM246639         |
|              |             | Cryphonectria hypovirus 1            | 3231                              | HM246640         |
|              |             | Cryphonectria hypovirus 1            | 3234                              | HM246641         |
|              |             | Cryphonectria hypovirus 1            | 3234                              | HM246642         |
|              |             | Cryphonectria hypovirus 1            | 3237                              | HM246643         |
|              |             | Cryphonectria hypovirus 1            | 3234                              | HM246644         |
|              |             | Cryphonectria hypovirus 1            | 3234                              | HM246645         |
|              |             | Cryphonectria hypovirus 1            | 3234                              | HM246646         |
|              |             | Cryphonectria hypovirus 1            | 3237                              | HM246647         |
|              |             | Cryphonectria hypovirus 1            | 3232                              | HM246648         |
|              |             | Cryphonectria hypovirus 1            | 2769                              | HM246649         |
|              |             | Cryphonectria hypovirus 1            | 3237                              | HM246650         |
|              |             | Cryphonectria hypovirus 1            | 12730                             | KT726153         |
|              |             | Cryphonectria hypovirus 1            | 12734                             | NC_001492        |
|              |             | Cryphonectria hypovirus 3            | 9799                              | NC_000960        |
|              |             | Cryphonectria hypovirus 3 (CS)       | 9591                              | AF188514         |
|              |             | Cryphonectria hypovirus 3 RNA2       | 3634                              | AF276810         |
|              |             | Cryphonectria hypovirus 4            | 9149                              | NC_006431        |
|              |             | Fusarium graminearum hypovirus 1     | 13023                             | NC_023680        |
|              |             | Fusarium graminearum hypovirus 2     | 4553                              | KP208179         |
|              |             | Fusarium graminearum hypovirus 2     | 12800                             | NC_026813        |
|              |             | Fusarium langsethiae hypovirus 1     | 12839                             | NC_032212        |
|              |             | Fusarium poae hypovirus 1            | 12795                             | LC150612         |
|              |             | Grapevine associated hypovirus-1     | 853                               | GU108593         |
|              |             | Phomopsis longicolla hypovirus       | 9760                              | NC_024685        |
|              |             | Sclerotinia sclerotiorum hypovirus 1 | 3657                              | JN084008         |
|              |             | Sclerotinia sclerotiorum hypovirus 1 | 10438                             | NC_015939        |
|              |             | Sclerotinia sclerotiorum hypovirus 2 | 14580                             | KF898354         |
|              |             | Sclerotinia sclerotiorum hypovirus 2 | 15239                             | KJ561218         |
|              |             | Sclerotinia sclerotiorum hypovirus 2 | 14581                             | NC_022896        |
|              |             | Trichoderma hypovirus                | 1923                              | JX291540         |
|              |             | Valsa ceratosperma hypovirus 1       | 9543                              | NC_017099        |
| Narnaviridae | Mitovirus   | Alternaria arborescens mitovirus 1   | 2506                              | NC_030747        |
|              |             | Alternaria brassicicola mitovirus    | 2506                              | KP705075         |
|              |             | Binucleate Rhizoctonia mitovirus K1  | 2794                              | NC_027921        |
|              |             | Botrytis cinerea mitovirus 1         | 2804                              | NC_011372        |
|              |             | Botrytis cinerea mitovirus 1 S       | 2171                              | EF583556         |
|              |             | Botrytis cinerea mitovirus 2         | 2497                              | NC_028471        |

| virus family | virus genus | virus species                                                      | genomic (segment) RNA length (bp) | Accession number |
|--------------|-------------|--------------------------------------------------------------------|-----------------------------------|------------------|
|              |             | Botrytis cinerea mitovirus 3                                       | 2922                              | NC_028472        |
|              |             | Botrytis cinerea mitovirus 4                                       | 2768                              | NC_028474        |
|              |             | Buergenerula spartinae mitovirus 1                                 | 2735                              | KJ485703         |
|              |             | Clitocybe odora virus                                              | 3765                              | NC_017003        |
|              |             | Cronartium ribicola mitovirus 1                                    | 2715                              | NC_030393        |
|              |             | Cronartium ribicola mitovirus 2                                    | 2471                              | NC_030395        |
|              |             | Cronartium ribicola mitovirus 3                                    | 2522                              | NC_030396        |
|              |             | Cronartium ribicola mitovirus 4                                    | 2479                              | NC_030397        |
|              |             | Cronartium ribicola mitovirus 5                                    | 2631                              | NC_030399        |
|              |             | Cryphonectria cubensis mitovirus 1a                                | 2555                              | AY328476         |
|              |             | Cryphonectria cubensis mitovirus 1b                                | 2601                              | AY328477         |
|              |             | Cryphonectria cubensis mitovirus 1c                                | 2501                              | AY328478         |
|              |             | Cryphonectria cubensis mitovirus 2a                                | 2639                              | AY328479         |
|              |             | Cryphonectria cubensis mitovirus 2c                                | 2419                              | AY328481         |
|              |             | Cryphonectria parasitica mitovirus 1-NB631                         | 2728                              | NC_004046        |
|              |             | Fusarium circinatum mitovirus 1                                    | 2419                              | KF803546         |
|              |             | Fusarium circinatum mitovirus 2-1                                  | 2193                              | KF803547         |
|              |             | Fusarium coeruleum mitovirus 1                                     | 2423                              | NC_026622        |
|              |             | Fusarium globosum mitovirus 1                                      | 2414                              | NC_026621        |
|              |             | Fusarium poae mitovirus 1                                          | 2397                              | NC_030861        |
|              |             | Fusarium poae mitovirus 2                                          | 2414                              | NC_030862        |
|              |             | Fusarium poae mitovirus 3                                          | 2718                              | NC_030863        |
|              |             | Fusarium poae mitovirus 4                                          | 2387                              | NC_030864        |
|              |             | Gremmeniella abietina mitochondrial RNA virus S2                   | 2587                              | NC_006264        |
|              |             | Gremmeniella abietina mitovirus S1                                 | 2572                              | AF534641         |
|              |             | Gremmeniella abietina non-host-specific mitochondrial RNA virus S1 | 2544                              | JN654496         |
|              |             | Helicobasidium mompa mitovirus 1-18 RDRP gene                      | 2411                              | AB110977         |
|              |             | Heterobasidion mitovirus 1                                         | 4379                              | KJ873059         |
|              |             | Hymenoscyphus fraxineus mitovirus 1                                | 2387                              | KJ667051         |
|              |             | Hymenoscyphus fraxineus mitovirus 1                                | 2350                              | KT809403         |
|              |             | Macrophomina phaseolina mitovirus 1                                | 2572                              | KP900894         |
|              |             | Macrophomina phaseolina mitovirus 3                                | 4179                              | KT823703         |
|              |             | Mitovirus AEF-2013                                                 | 2550                              | KF298270         |
|              |             | Mitovirus AEF-2013                                                 | 2486                              | KF298281         |
|              |             | Neofusicoccum luteum mitovirus 1                                   | 2389                              | NC_035114        |
|              |             | Ophiostoma mitovirus 1c                                            | 3107                              | KF026355         |
|              |             | Ophiostoma mitovirus 3a                                            | 2617                              | NC_004049        |
|              |             | Ophiostoma mitovirus 4                                             | 2599                              | NC_004052        |

| virus family | virus genus | virus species                              | genomic (segment) RNA length (bp) | Accession number |
|--------------|-------------|--------------------------------------------|-----------------------------------|------------------|
|              |             | Ophiostoma mitovirus 5                     | 2474                              | NC_004053        |
|              |             | Ophiostoma mitovirus 6                     | 2343                              | NC_004054        |
|              |             | Ophiostoma mitovirus 7                     | 2804                              | KF031943         |
|              |             | Rhizoctonia cerealis mitovirus             | 3149                              | KM517201         |
|              |             | Rhizoctonia mitovirus 1 RS002              | 2797                              | KC792591         |
|              |             | Rhizoctonia mitovirus 1 RS006-2            | 2779                              | KC792598         |
|              |             | Rhizoctonia oryzae-sativae mitovirus 1     | 3038                              | NC_029991        |
|              |             | Rhizoctonia solani mitovirus 11            | 3283                              | KP900906         |
|              |             | Rhizoctonia solani mitovirus 12            | 3378                              | KP900907         |
|              |             | Rhizoctonia solani mitovirus 13            | 3039                              | KP900908         |
|              |             | Rhizoctonia solani mitovirus 15            | 3901                              | KP900910         |
|              |             | Rhizoctonia solani mitovirus 2             | 2865                              | KP900911         |
|              |             | Rhizoctonia solani mitovirus 6             | 2615                              | KP900915         |
|              |             | Rhizoctonia solani mitovirus 8             | 3225                              | KP900917         |
|              |             | Rhizophagus sp. HR1 mitovirus              | 3668                              | AB855794         |
|              |             | Rhizophagus sp. RF1 mitovirus              | 2895                              | AB558120         |
|              |             | Sclerotinia homoeocarpa mitovirus          | 2632                              | AY172454         |
|              |             | Sclerotinia nivalis mitovirus 1            | 2720                              | KT365895         |
|              |             | Sclerotinia nivalis mitovirus 2            | 2583                              | KT365896         |
|              |             | Sclerotinia sclerotiorum mitovirus 1       | 2513                              | JQ013377         |
|              |             | Sclerotinia sclerotiorum mitovirus 1 HC025 | 2530                              | NC_026510        |
|              |             | Sclerotinia sclerotiorum mitovirus 11      | 2708                              | KF913886         |
|              |             | Sclerotinia sclerotiorum mitovirus 12      | 2593                              | KF913887         |
|              |             | Sclerotinia sclerotiorum mitovirus 14      | 2564                              | KF913889         |
|              |             | Sclerotinia sclerotiorum mitovirus 15      | 2548                              | KF913890         |
|              |             | Sclerotinia sclerotiorum mitovirus 17      | 2447                              | KP900924         |
|              |             | Sclerotinia sclerotiorum mitovirus 18      | 2509                              | KP900925         |
|              |             | Sclerotinia sclerotiorum mitovirus 19      | 3185                              | KP900926         |
|              |             | Sclerotinia sclerotiorum mitovirus 2       | 2445                              | JQ013378         |
|              |             | Sclerotinia sclerotiorum mitovirus 2       | 2438                              | JX401536         |
|              |             | Sclerotinia sclerotiorum mitovirus 2       | 2438                              | KJ462508         |
|              |             | Sclerotinia sclerotiorum mitovirus 20      | 2648                              | KP900927         |
|              |             | Sclerotinia sclerotiorum mitovirus 3       | 2588                              | JX401537         |
|              |             | Sclerotinia sclerotiorum mitovirus 3       | 2617                              | NC_028475        |
|              |             | Sclerotinia sclerotiorum mitovirus 4       | 2744                              | JX401538         |
|              |             | Sclerotinia sclerotiorum mitovirus 4       | 2752                              | KT962974         |
|              |             | Sclerotinia sclerotiorum mitovirus 5       | 2498                              | KJ462509         |
|              |             | Sclerotinia sclerotiorum mitovirus 5       | 2498                              | KJ462510         |

| virus family   | virus genus       | virus species                                    | genomic (segment) RNA length (bp) | Accession number |
|----------------|-------------------|--------------------------------------------------|-----------------------------------|------------------|
|                |                   | Sclerotinia sclerotiorum mitovirus 5             | 2497                              | KJ462511         |
|                |                   | Sclerotinia sclerotiorum mitovirus 6             | 2535                              | KF913881         |
|                |                   | Sclerotinia sclerotiorum mitovirus 6             | 2584                              | KJ462512         |
|                |                   | Sclerotinia sclerotiorum mitovirus 6             | 2586                              | KJ462513         |
|                |                   | Sclerotinia sclerotiorum mitovirus 6             | 2563                              | NC_023598        |
|                |                   | Sclerotinia sclerotiorum mitovirus 7             | 2648                              | KF913882         |
|                |                   | Sclerotinia sclerotiorum mitovirus 7             | 2815                              | KJ462514         |
|                |                   | Sclerotinia sclerotiorum mitovirus 8             | 2565                              | KF913883         |
|                |                   | Sclerotinia sclerotiorum mitovirus 9             | 2562                              | KF913884         |
|                |                   | Thielaviopsis basicola mitovirus                 | 2896                              | NC_012585        |
|                |                   | Tuber aestivum mitovirus                         | 3480                              | NC_015629        |
|                |                   | Tuber excavatum mitovirus                        | 3305                              | JN222389         |
|                | Narnavirus        | Fusarium poae narnavirus 1                       | 2297                              | NC_030865        |
|                |                   | Fusarium poae narnavirus 2                       | 2054                              | NC_030866        |
|                |                   | Grapevine associated narnavirus-1                | 622                               | GU108590         |
|                |                   | Grapevine associated narnavirus-1                | 2733                              | NC_028473        |
|                |                   | Leptomonas seymouri Narna-like virus 1 segment L | 2914                              | KU935604         |
|                |                   | Leptomonas seymouri Narna-like virus 1 segment S | 1455                              | KU935605         |
|                |                   | Phytomonas serpens narnavirus 1                  | 3782                              | NC_030308        |
|                |                   | Saccharomyces 20S RNA narnavirus                 | 2514                              | NC_004051        |
|                |                   | Saccharomyces 23S RNA narnavirus                 | 2891                              | NC_004050        |
|                | unclassified      | Diatom colony associated dsRNA virus 2           | 4586                              | AP014913         |
| Partitiviridae | Alphapartitivirus | Helicobasidium mompa partitivirus V1-1 RDRP gene | 2247                              | AB110979         |
|                |                   | Helicobasidium mompa partitivirus V1-2 RDRP gene | 1776                              | AB110980         |
|                |                   | Heterobasidion RNA virus 1 CP                    | 1866                              | HQ541324         |
|                |                   | Heterobasidion RNA virus 1 RdRp                  | 2027                              | HQ541323         |
|                |                   | Heterobasidion RNA virus 1 RdRp                  | 2029                              | HQ541328         |
|                |                   | Heterobasidion RNA virus 1 RdRp                  | 2033                              | HQ541329         |
|                |                   | Heterobasidion RNA virus 1 RdRp                  | 2030                              | HQ541330         |
|                |                   | Heterobasidion RNA virus 1 RdRp                  | 2028                              | HQ541332         |
|                |                   | Heterobasidion RNA Virus 3 CP                    | 1826                              | FJ816272         |
|                |                   | Heterobasidion RNA Virus 3 RdRp                  | 1885                              | FJ816271         |
|                |                   | Rosellinia necatrix partitivirus 2 CP            | 1828                              | NC_020235        |
|                |                   | Rosellinia necatrix partitivirus 2 RdRp          | 1985                              | NC_020234        |
|                | Betapartitivirus  | Atkinsonella hypoxylon partitivirus RNA 1        | 2180                              | NC_003470        |
|                |                   | Atkinsonella hypoxylon partitivirus RNA 2        | 2135                              | NC_003471        |
|                |                   | Cannabis cryptic virus CP                        | 2290                              | JN196537         |
|                |                   | Cannabis cryptic virus CP                        | 2266                              | NC_031130        |

| virus family | virus genus | virus species                                   | genomic (segment) RNA length (bp) | Accession number |
|--------------|-------------|-------------------------------------------------|-----------------------------------|------------------|
|              |             | Cannabis cryptic virus RdRp                     | 2420                              | JN196536         |
|              |             | Cannabis cryptic virus RdRp                     | 2397                              | NC_031134        |
|              |             | Ceratocystis resinifera virus 1 RNA 1           | 2207                              | NC_010755        |
|              |             | Ceratocystis resinifera virus 1 RNA 2           | 2305                              | NC_010754        |
|              |             | Crimson clover cryptic virus 2 RNA 1            | 2444                              | JX971982         |
|              |             | Crimson clover cryptic virus 2 RNA 2            | 2354                              | JX971983         |
|              |             | Cucurbitaria piceae virus 1 segment 1           | 2318                              | KT343866         |
|              |             | Dill cryptic virus 2 RNA 1                      | 2430                              | NC_021147        |
|              |             | Dill cryptic virus 2 RNA 2                      | 2354                              | NC_021148        |
|              |             | Fusarium poae virus 1 RNA 1                     | 2185                              | NC_003883        |
|              |             | Fusarium poae virus 1 RNA 2                     | 2203                              | NC_003884        |
|              |             | Fusarium poae virus 1-240374 segment 1          | 2431                              | NC_030882        |
|              |             | Fusarium poae virus 1-240374 segment 2          | 2231                              | NC_030877        |
|              |             | Heterobasidion annosum P-type partitivirus RdRp | 2325                              | AF473549         |
|              |             | Heterobasidion partitivirus 17 RdRp             | 2016                              | KJ873060         |
|              |             | Heterobasidion partitivirus 2 CP                | 2238                              | HM565954         |
|              |             | Heterobasidion partitivirus 2 RdRp              | 2290                              | HM565953         |
|              |             | Heterobasidion partitivirus 8 CP                | 2235                              | JX625228         |
|              |             | Heterobasidion partitivirus 8 RdRp              | 2281                              | JX625227         |
|              |             | Hop trefoil cryptic virus 2 RNA 1               | 2431                              | NC_021098        |
|              |             | Hop trefoil cryptic virus 2 RNA 2               | 2349                              | NC_021099        |
|              |             | Lentinula edodes partitivirus 1 CP              | 2245                              | KX354972         |
|              |             | Lentinula edodes partitivirus 1 RdRp            | 2382                              | KX354971         |
|              |             | Pleurotus ostreatus virus 1 RNA-1               | 2296                              | NC_006961        |
|              |             | Pleurotus ostreatus virus 1 RNA-2               | 2223                              | NC_006960        |
|              |             | Primula malacoides virus China/Mar2007 RNA 1    | 2390                              | NC_013109        |
|              |             | Primula malacoides virus China/Mar2007 RNA 2    | 2344                              | NC_013110        |
|              |             | Red clover cryptic virus 2 RNA 1                | 2430                              | NC_021096        |
|              |             | Red clover cryptic virus 2 RNA 2                | 2353                              | NC_021097        |
|              |             | Rhizoctonia solani virus 717 RNA 1              | 1869                              | KM657430         |
|              |             | Rhizoctonia solani virus 717 RNA 2              | 1833                              | KM657431         |
|              |             | Rhizoctonia solani virus 717 RNA1               | 2363                              | NC_003801        |
|              |             | Rhizoctonia solani virus RNA2                   | 2206                              | NC_003802        |
|              |             | Rosellinia necatrix partitivirus 1-W8 segment 1 | 2299                              | NC_007537        |
|              |             | Rosellinia necatrix partitivirus 1-W8 segment 2 | 2279                              | NC_007538        |
|              |             | Rosellinia necatrix partitivirus 6 CP           | 2499                              | NC_028250        |
|              |             | Rosellinia necatrix partitivirus 6 RdRp         | 1946                              | LC062720         |
|              |             | Rosellinia necatrix partitivirus 6 RdRp         | 2204                              | LC062721         |

| virus family | virus genus       | virus species                                         | genomic (segment) RNA length (bp) | Accession number |
|--------------|-------------------|-------------------------------------------------------|-----------------------------------|------------------|
|              |                   | Rosellinia necatrix partitivirus 6 RdRp               | 2266                              | LC062722         |
|              |                   | Rosellinia necatrix partitivirus 6 RdRp               | 2047                              | LC062723         |
|              |                   | Rosellinia necatrix partitivirus 6 RdRp               | 2076                              | LC062724         |
|              |                   | Rosellinia necatrix partitivirus 6 RdRp               | 2254                              | LC062725         |
|              |                   | Rosellinia necatrix partitivirus 6 RdRp               | 1979                              | LC062726         |
|              |                   | Rosellinia necatrix partitivirus 6 RdRp               | 1808                              | LC062727         |
|              |                   | Rosellinia necatrix partitivirus 6 RdRp               | 2462                              | NC_028251        |
|              |                   | White clover cryptic virus 2 RNA 1                    | 2435                              | NC_021094        |
|              |                   | White clover cryptic virus 2 RNA 2                    | 2348                              | NC_021095        |
|              | Gammapartitivirus | Aspergillus ochraceous virus CP                       | 1555                              | EU118278         |
|              |                   | Aspergillus ochraceous virus RdRp                     | 1754                              | DQ270031         |
|              |                   | Aspergillus ochraceous virus RdRp                     | 1754                              | EU118277         |
|              |                   | Discula destructiva virus 1 segment 1                 | 1787                              | NC_002797        |
|              |                   | Discula destructiva virus 1 segment 2                 | 1585                              | NC_002800        |
|              |                   | Discula destructiva virus 2 segment 1                 | 1781                              | NC_003710        |
|              |                   | Discula destructiva virus 2 segment 2                 | 1611                              | NC_003711        |
|              |                   | Fusarium solani virus 1 RNA 1                         | 1645                              | NC_003885        |
|              |                   | Fusarium solani virus 1 RNA 2                         | 1445                              | NC_003886        |
|              |                   | Gremmeniella abietina RNA virus MS1 RNA 1             | 1781                              | KJ786413         |
|              |                   | Gremmeniella abietina RNA virus MS1 RNA 1             | 1782                              | NC_004018        |
|              |                   | Gremmeniella abietina RNA virus MS1 RNA 2             | 1586                              | KJ786411         |
|              |                   | Gremmeniella abietina RNA virus MS1 RNA 2             | 1586                              | NC_004019        |
|              |                   | Gremmeniella abietina RNA virus MS1 RNA 3             | 1187                              | KJ786412         |
|              |                   | Gremmeniella abietina RNA virus MS1 RNA 3             | 1186                              | NC_004020        |
|              |                   | Gremmeniella abietina RNA virus MS2 unnamed segment 1 | 1781                              | AY615211         |
|              |                   | Gremmeniella abietina RNA virus MS2 unnamed segment 2 | 1586                              | AY615212         |
|              |                   | Gremmeniella abietina RNA virus MS2 unnamed segment 3 | 1186                              | AY615213         |
|              |                   | Penicillium stoloniferum virus F segment 1            | 1677                              | NC_007221        |
|              |                   | Penicillium stoloniferum virus F segment 2            | 1500                              | NC_007222        |
|              |                   | Penicillium stoloniferum virus S segment 1            | 1754                              | NC_005976        |
|              |                   | Penicillium stoloniferum virus S segment 2            | 1582                              | NC_005977        |
|              | unclassified      | Alternaria alternata partitivirus 1 RNA 1             | 1833                              | KY352402         |
|              |                   | Alternaria alternata partitivirus 1 RNA 2             | 1680                              | KY352403         |
|              |                   | Amasya cherry disease-associated mycovirus CP         | 1839                              | NC_006440        |
|              |                   | Amasya cherry disease-associated mycovirus RdRp       | 2002                              | NC_006441        |
|              |                   | Arabidopsis halleri partitivirus 1 segment 1          | 1959                              | NC_030889        |
|              |                   | Arabidopsis halleri partitivirus 1 segment 2          | 1763                              | NC_030890        |
|              |                   | Aspergillus fumigatus partitivirus 1 CP               | 1623                              | FN398100         |

| virus family | virus genus | virus species                                   | genomic (segment) RNA length (bp) | Accession number |
|--------------|-------------|-------------------------------------------------|-----------------------------------|------------------|
|              |             | Aspergillus fumigatus partitivirus 1 RdRp       | 1779                              | FN376847         |
|              |             | Bipolaris maydis partitivirus 1 RNA 1           | 1930                              | NC_034514        |
|              |             | Bipolaris maydis partitivirus 1 RNA 2           | 1790                              | NC_034524        |
|              |             | Botryosphaeria dothidea partitivirus 1 CP       | 1623                              | KF688741         |
|              |             | Botryosphaeria dothidea partitivirus 1 RdRp     | 1823                              | KF688740         |
|              |             | Botryosphaeria dothidea virus 1 RNA 1           | 1757                              | KJ722537         |
|              |             | Botryosphaeria dothidea virus 1 RNA 2           | 1392                              | KJ722538         |
|              |             | Botryosphaeria dothidea virus 1 RNA 3           | 1124                              | KJ722539         |
|              |             | Botryotinia fuckeliana partitivirus 1 segment 1 | 1793                              | NC_010349        |
|              |             | Botryotinia fuckeliana partitivirus 1 segment 2 | 1566                              | NC_010350        |
|              |             | Botryotinia fuckeliana partitivirus 1 segment 3 | 1383                              | NC_010351        |
|              |             | Botrytis cinerea partitivirus 1 CP              | 2219                              | KF201714         |
|              |             | Carnation cryptic virus 3 RNA 1                 | 1573                              | NC_034513        |
|              |             | Carnation cryptic virus 3 RNA 2                 | 1562                              | NC_034523        |
|              |             | Ceratocystis polonica partitivirus CP           | 2252                              | AY260757         |
|              |             | Ceratocystis polonica partitivirus RdRp         | 2156                              | AY260756         |
|              |             | Ceratocystis polonica partitivirus segment 1    | 2315                              | NC_010705        |
|              |             | Ceratocystis polonica partitivirus segment 2    | 2252                              | NC_010706        |
|              |             | Colletotrichum partitivirus 1 CP                | 1535                              | KP900885         |
|              |             | Colletotrichum truncatum partitivirus 1 RdRp    | 1820                              | KR074421         |
|              |             | Flammulina velutipes isometric virus RdRp gene  | 1919                              | AB428575         |
|              |             | Fusarium poae partitivirus 2 segment 1          | 2403                              | NC_030878        |
|              |             | Fusarium poae partitivirus 2 segment 2          | 2413                              | NC_030879        |
|              |             | Fusarium solani partitivirus 2 RdRp             | 1950                              | LC006130         |
|              |             | Grapevine associated partitivirus-1 RdRp        | 2231                              | GU108584         |
|              |             | Grapevine partitivirus RdRp                     | 2319                              | JX658566         |
|              |             | Grapevine partitivirus RdRp                     | 1945                              | JX658569         |
|              |             | Grapevine partitivirus RdRp                     | 1775                              | JX658570         |
|              |             | Grapevine partitivirus RdRp                     | 2261                              | JX658571         |
|              |             | Heterobasidion partitivirus 12 CP               | 1806                              | KF963176         |
|              |             | Heterobasidion partitivirus 12 RdRp             | 1884                              | KF963175         |
|              |             | Heterobasidion partitivirus 13 CP               | 1776                              | KF963178         |
|              |             | Heterobasidion partitivirus 13 CP               | 1775                              | KF963180         |
|              |             | Heterobasidion partitivirus 13 RdRp             | 1873                              | KF963177         |
|              |             | Heterobasidion partitivirus 13 RdRp             | 1872                              | KF963179         |
|              |             | Heterobasidion partitivirus 14 RdRp             | 1886                              | KF963185         |
|              |             | Heterobasidion partitivirus 15 CP               | 1791                              | KF963187         |
|              |             | Heterobasidion partitivirus 15 RdRp             | 1882                              | KF963186         |

| virus family | virus genus | virus species                                                | genomic (segment) RNA length (bp) | Accession number |
|--------------|-------------|--------------------------------------------------------------|-----------------------------------|------------------|
|              |             | Heterobasidion partitivirus 7 CP                             | 2231                              | JN606090         |
|              |             | Heterobasidion partitivirus 7 RdRp                           | 2297                              | JN606091         |
|              |             | Heterobasidion partitivirus 9 RdRp                           | 2030                              | JN606085         |
|              |             | Heterobasidion RNA virus 4 RdRp                              | 2007                              | HQ541325         |
|              |             | Heterobasidion RNA virus 5 RdRp                              | 2000                              | HQ541326         |
|              |             | Partitivirus-like 3 RdRp                                     | 1705                              | KX148577         |
|              |             | Penicillium aurantiogriseum partitivirus 1 RNA 1             | 1762                              | NC_028499        |
|              |             | Penicillium aurantiogriseum partitivirus 1 RNA 2             | 1576                              | NC_028494        |
|              |             | Pseudogymnoascus destructans partitivirus-pa RNA 1           | 1761                              | KY207543         |
|              |             | Pseudogymnoascus destructans partitivirus-pa RNA 2           | 1590                              | KY207544         |
|              |             | Pseudogymnoascus destructans virus CP                        | 1524                              | NC_030479        |
|              |             | Pseudogymnoascus destructans virus RdRp                      | 1682                              | NC_030480        |
|              |             | Radish partitivirus JC-2004 RdRp                             | 1866                              | AY748911         |
|              |             | Raphanus sativus partitivirus 1 RdRp                         | 1915                              | KT285019         |
|              |             | Rhizoctonia fumigata partitivirus CP                         | 1802                              | KM668043         |
|              |             | Rhizoctonia fumigata partitivirus RdRp                       | 2003                              | KM668042         |
|              |             | Rhizoctonia solani dsRNA virus 2 segment 1                   | 2020                              | NC_023684        |
|              |             | Rhizoctonia solani dsRNA virus 2 segment 2                   | 1810                              | NC_023685        |
|              |             | Rose partitivirus RNA 1                                      | 1937                              | KU896858         |
|              |             | Rose partitivirus RNA 2                                      | 1811                              | KU896859         |
|              |             | Rosellinia necatrix partitivirus 3 CP                        | 2247                              | LC010951         |
|              |             | Rosellinia necatrix partitivirus 3 RdRp                      | 2315                              | LC010950         |
|              |             | Rosellinia necatrix partitivirus 3 RNA 1                     | 2254                              | AB698491         |
|              |             | Rosellinia necatrix partitivirus 4 RNA 1                     | 2418                              | AB698493         |
|              |             | Rosellinia necatrix partitivirus 5 RNA 1                     | 2028                              | AB698494         |
|              |             | Rosellinia necatrix partitivirus 7 segment 1                 | 1977                              | LC076694         |
|              |             | Rosellinia necatrix partitivirus 7 segment 2                 | 1896                              | LC076695         |
|              |             | Sclerotinia sclerotiorum partitivirus 1 CP                   | 2292                              | JX297510         |
|              |             | Sclerotinia sclerotiorum partitivirus 1 RdRp                 | 2334                              | JX297511         |
|              |             | Sclerotinia sclerotiorum partitivirus S segment 1            | 1874                              | NC_013014        |
|              |             | Sclerotinia sclerotiorum partitivirus S segment 2            | 1852                              | NC_013015        |
|              |             | Sophora japonica powdery mildew-associated partitivirus CP   | 1918                              | NC_030876        |
|              |             | Sophora japonica powdery mildew-associated partitivirus RdRp | 1955                              | NC_030875        |
|              |             | Ustilagoidea virens partitivirus 2 CP                        | 2082                              | KF680479         |
|              |             | Ustilagoidea virens partitivirus 2 RdRp                      | 2112                              | KF680478         |
|              |             | Ustilagoidea virens partitivirus 2 segment 1                 | 1712                              | NC_021873        |
|              |             | Ustilagoidea virens partitivirus 2 segment 2                 | 1352                              | NC_021874        |
|              |             | Ustilagoidea virens partitivirus 3                           | 1711                              | KC469948         |

| virus family | virus genus  | virus species                                      | genomic (segment) RNA length (bp) | Accession number |
|--------------|--------------|----------------------------------------------------|-----------------------------------|------------------|
|              |              | Ustilaginoidea virens partitivirus CP              | 1604                              | KF805087         |
|              |              | Ustilaginoidea virens partitivirus segment 1       | 1775                              | KC503898         |
|              |              | Ustilaginoidea virens partitivirus segment 2       | 1588                              | KC503899         |
|              |              | Ustilaginoidea virens partitivirus segment 3       | 1352                              | KC503900         |
|              |              | Ustilaginoidea virens partitivirus segment 4       | 1119                              | KC503901         |
|              |              | Verticillium albo-atrum partitivirus-1 RNA 1       | 1730                              | KJ476945         |
|              |              | Verticillium albo-atrum partitivirus-1 RNA 2       | 1517                              | KJ476946         |
|              |              | Verticillium dahliae partitivirus 1 CP             | 1587                              | KC422243         |
|              |              | Verticillium dahliae partitivirus 1 RdRp           | 1768                              | KC422244         |
|              |              | Verticillium dahliae partitivirus 1 RNA 1          | 1767                              | NC_027822        |
|              |              | Verticillium dahliae partitivirus 1 RNA 2          | 1574                              | NC_027823        |
|              |              | Vicia faba partitivirus 1 RNA 3                    | 1915                              | DQ910762         |
| Reoviridae   | Mycoreovirus | Cryphonectria parasitica mycoreovirus 2 segment 3  | 3213                              | DQ902580         |
|              |              | Mycoreovirus 1 segment 1                           | 4127                              | NC_010743        |
|              |              | Mycoreovirus 1 segment 10                          | 975                               | NC_010752        |
|              |              | Mycoreovirus 1 segment 11                          | 732                               | NC_010753        |
|              |              | Mycoreovirus 1 segment 2                           | 3846                              | NC_010744        |
|              |              | Mycoreovirus 1 segment 3                           | 3258                              | NC_010745        |
|              |              | Mycoreovirus 1 segment 4                           | 2269                              | NC_010746        |
|              |              | Mycoreovirus 1 segment 5                           | 2056                              | NC_010747        |
|              |              | Mycoreovirus 1 segment 6                           | 2023                              | NC_010748        |
|              |              | Mycoreovirus 1 segment 7                           | 1539                              | NC_010749        |
|              |              | Mycoreovirus 1 segment 8                           | 1536                              | NC_010750        |
|              |              | Mycoreovirus 1 segment 9                           | 1072                              | NC_010751        |
|              |              | Mycoreovirus 3 segment 10                          | 1171                              | NC_007529        |
|              |              | Mycoreovirus 3 segment 11                          | 1003                              | NC_007531        |
|              |              | Mycoreovirus 3 segment 12                          | 943                               | NC_007532        |
|              |              | Mycoreovirus 3 segment 6                           | 2030                              | NC_007525        |
|              |              | Mycoreovirus 3 segment 7                           | 1509                              | NC_007526        |
|              |              | Mycoreovirus 3 segment 8                           | 1299                              | NC_007527        |
|              |              | Mycoreovirus 3 segment 9                           | 1226                              | NC_007528        |
|              |              | Mycoreovirus 3 segment S1                          | 4143                              | NC_007535        |
|              |              | Mycoreovirus 3 segment S2                          | 3773                              | NC_007533        |
|              |              | Mycoreovirus 3 segment S3                          | 3310                              | NC_007536        |
|              |              | Mycoreovirus 3 segment S5                          | 2089                              | NC_007534        |
|              |              | Mycoreovirus 3 segment X                           | 2259                              | NC_007524        |
|              |              | Sclerotinia sclerotiorum mycoreovirus 4 segment 1  | 4143                              | NC_030158        |
|              |              | Sclerotinia sclerotiorum mycoreovirus 4 segment 10 | 1170                              | NC_030155        |

| virus family                                     | virus genus     | virus species                                      | genomic (segment) RNA length (bp) | Accession number |
|--------------------------------------------------|-----------------|----------------------------------------------------|-----------------------------------|------------------|
|                                                  |                 | Sclerotinia sclerotiorum mycoreovirus 4 segment 11 | 1093                              | NC_030156        |
|                                                  |                 | Sclerotinia sclerotiorum mycoreovirus 4 segment 12 | 1000                              | NC_030157        |
|                                                  |                 | Sclerotinia sclerotiorum mycoreovirus 4 segment 2  | 3775                              | NC_030161        |
|                                                  |                 | Sclerotinia sclerotiorum mycoreovirus 4 segment 3  | 3307                              | NC_030162        |
|                                                  |                 | Sclerotinia sclerotiorum mycoreovirus 4 segment 4  | 2259                              | NC_030159        |
|                                                  |                 | Sclerotinia sclerotiorum mycoreovirus 4 segment 5  | 2084                              | NC_030163        |
|                                                  |                 | Sclerotinia sclerotiorum mycoreovirus 4 segment 6  | 2029                              | NC_030160        |
|                                                  |                 | Sclerotinia sclerotiorum mycoreovirus 4 segment 7  | 1512                              | NC_030152        |
|                                                  |                 | Sclerotinia sclerotiorum mycoreovirus 4 segment 8  | 1304                              | NC_030153        |
|                                                  |                 | Sclerotinia sclerotiorum mycoreovirus 4 segment 9  | 1223                              | NC_030154        |
| Totiviridae                                      | Leishmaniavirus | Leishmania aethiopica RNA virus                    | 5193                              | NC_024115        |
|                                                  |                 | Leishmania RNA virus 1                             | 2480                              | JX313126         |
|                                                  |                 | Leishmania RNA virus 1                             | 3228                              | JX313127         |
|                                                  |                 | Leishmania RNA virus 1                             | 4969                              | KC862308         |
|                                                  |                 | Leishmania RNA virus 1 - 1                         | 5284                              | NC_002063        |
|                                                  |                 | Leishmania RNA virus 1 - 4                         | 5283                              | NC_003601        |
|                                                  |                 | Leishmania RNA virus 2                             | 5048                              | KF256264         |
|                                                  |                 | Leishmania RNA virus 2                             | 5048                              | KF256265         |
|                                                  |                 | Leishmania RNA virus 2 - 1                         | 5241                              | NC_002064        |
|                                                  | Totivirus       | Anopheles totivirus                                | 6364                              | KX148550         |
|                                                  |                 | Black raspberry virus F                            | 5077                              | NC_009890        |
|                                                  |                 | Botryotinia fuckeliana totivirus 1                 | 5261                              | NC_009224        |
|                                                  |                 | Culex tritaeniorhynchus totivirus                  | 7612                              | KX456218         |
|                                                  |                 | Culex tritaeniorhynchus totivirus                  | 7624                              | KX456219         |
|                                                  |                 | Delisea pulchra totivirus IndA                     | 2463                              | KT455449         |
|                                                  |                 | Delisea pulchra totivirus IndA                     | 2334                              | KT455450         |
|                                                  |                 | Delisea pulchra totivirus IndA                     | 2460                              | KT455451         |
|                                                  |                 | Drosophila melanogaster totivirus SW-2009a         | 6780                              | NC_013499        |
|                                                  |                 | Golden shiner totivirus                            | 7788                              | NC_030295        |
|                                                  |                 | Grapevine associated totivirus-1                   | 4218                              | GU108585         |
| Grapevine associated totivirus-2                 | 6595            | GU108594                                           |                                   |                  |
| Grapevine associated totivirus-2                 | 4967            | GU108595                                           |                                   |                  |
| Gremmeniella abietina RNA virus L2               | 5129            | NC_005965                                          |                                   |                  |
| Maize-associated totivirus 1                     | 3956            | NC_028044                                          |                                   |                  |
| Maize-associated totivirus 2                     | 4713            | NC_030398                                          |                                   |                  |
| Penicillium aurantiogriseum totivirus 1          | 5181            | NC_028948                                          |                                   |                  |
| Phomopsis longicolla totivirus 1                 | 4005            | KP900901                                           |                                   |                  |
| Red clover powdery mildew-associated totivirus 1 | 4673            | LC075486                                           |                                   |                  |

| virus family | virus genus  | virus species                                    | genomic (segment) RNA length (bp) | Accession number |
|--------------|--------------|--------------------------------------------------|-----------------------------------|------------------|
|              |              | Red clover powdery mildew-associated totivirus 1 | 4781                              | NC_028480        |
|              |              | Red clover powdery mildew-associated totivirus 2 | 4178                              | NC_028481        |
|              |              | Red clover powdery mildew-associated totivirus 3 | 4784                              | NC_028483        |
|              |              | Red clover powdery mildew-associated totivirus 4 | 4455                              | LC075489         |
|              |              | Red clover powdery mildew-associated totivirus 5 | 5056                              | NC_028485        |
|              |              | Red clover powdery mildew-associated totivirus 6 | 5007                              | NC_028486        |
|              |              | Red clover powdery mildew-associated totivirus 7 | 4942                              | NC_028488        |
|              |              | Red clover powdery mildew-associated totivirus 8 | 5065                              | LC075493         |
|              |              | Red clover powdery mildew-associated totivirus 9 | 5997                              | NC_028490        |
|              |              | Saccharomyces cerevisiae virus L-A               | 4580                              | M28353           |
|              |              | Saccharomyces cerevisiae virus L-A               | 4579                              | NC_003745        |
|              |              | Saccharomyces cerevisiae virus L-A CP            | 540                               | EF025209         |
|              |              | Saccharomyces cerevisiae virus L-A CP            | 819                               | M24336           |
|              |              | Saccharomyces cerevisiae virus L-A-2             | 4580                              | KC677754         |
|              |              | Saccharomyces cerevisiae virus L-A-28            | 4584                              | KU845301         |
|              |              | Saccharomyces cerevisiae virus L-A-lus           | 4580                              | JN819511         |
|              |              | Saccharomyces cerevisiae virus L-BC              | 4615                              | NC_001641        |
|              |              | Saccharomyces cerevisiae virus L-BC-2            | 4614                              | KX906605         |
|              |              | Saccharomyces cerevisiae virus L-BC-lus          | 4614                              | KT784813         |
|              |              | Scheffersomyces segobiensis virus L              | 4590                              | KC610514         |
|              |              | Tianjin totivirus                                | 7611                              | NC_017084        |
|              |              | Tuber aestivum virus 1                           | 4587                              | HQ158596         |
|              |              | Ustilago maydis virus                            | 1034                              | L76358           |
|              |              | Ustilago maydis virus H1                         | 6099                              | NC_003823        |
|              |              | Ustilago maydis virus P1                         | 1504                              | M63149           |
|              |              | Ustilago maydis virus P4                         | 1004                              | L12226           |
|              |              | Ustilago maydis virus P4 KP4                     | 576                               | U25179           |
|              |              | Ustilago maydis virus P6                         | 1234                              | M27418           |
|              |              | Xanthophyllomyces dendrorhous virus L1A          | 4655                              | NC_020903        |
|              |              | Xanthophyllomyces dendrorhous virus L1b          | 4619                              | JN997473         |
|              |              | Xanthophyllomyces dendrorhous virus L2           | 3666                              | JN997474         |
|              | unclassified | Armigeres subalbatus virus SaX06-AK20            | 7510                              | NC_014609        |
|              |              | Camponotus nipponicus virus                      | 5713                              | NC_029312        |
|              |              | Diatom colony associated dsRNA virus 10          | 5082                              | AP014902         |
|              |              | Diatom colony associated dsRNA virus 11          | 5160                              | AP014903         |
|              |              | Diatom colony associated dsRNA virus 13          | 4671                              | AP014905         |
|              |              | Diatom colony associated dsRNA virus 3           | 4911                              | AP014893         |
|              |              | Diatom colony associated dsRNA virus 4           | 4979                              | AP014895         |

| virus family | virus genus  | virus species                                     | genomic (segment) RNA length (bp) | Accession number |
|--------------|--------------|---------------------------------------------------|-----------------------------------|------------------|
|              |              | Diatom colony associated dsRNA virus 5            | 5252                              | AP014896         |
|              |              | Diatom colony associated dsRNA virus 6            | 4939                              | AP014897         |
|              |              | Diatom colony associated dsRNA virus 7            | 5327                              | AP014898         |
|              |              | Diatom colony associated dsRNA virus 8            | 4660                              | AP014899         |
|              |              | Diatom colony associated dsRNA virus 9 type A     | 4844                              | AP014900         |
|              |              | Diatom colony associated dsRNA virus 9 type B     | 4845                              | AP014901         |
|              |              | Diatom colony associated virus-Like RNA Segment 3 | 3458                              | AP014916         |
|              |              | Diatom colony associated virus-Like RNA Segment 5 | 3262                              | AP014918         |
|              |              | Eimeria brunetti RNA virus 1                      | 5358                              | NC_002701        |
|              |              | Panax notoginseng virus A                         | 5003                              | NC_029096        |
|              |              | Saccharomyces kudriavzevii virus L-A1             | 4580                              | NC_032106        |
|              | Victorivirus | Alternaria arborescens victorivirus 1             | 5206                              | LC086813         |
|              |              | Aspergillus foetidus slow virus 1                 | 5194                              | HE588147         |
|              |              | Beauveria bassiana victorivirus 1                 | 5228                              | HE572591         |
|              |              | Beauveria bassiana victorivirus 1                 | 5329                              | KR011117         |
|              |              | Beauveria bassiana victorivirus NZL/1980          | 5327                              | NC_024151        |
|              |              | Botryosphaeria dothidea victorivirus 1            | 5322                              | NC_025214        |
|              |              | Chalara elegans RNA Virus 1                       | 5310                              | NC_005883        |
|              |              | Coniothyrium minitans mycovirus CP                | 2389                              | AF521012         |
|              |              | Coniothyrium minitans RNA virus                   | 4975                              | NC_007523        |
|              |              | Eimeria tenella RNA virus 1                       | 6006                              | NC_026140        |
|              |              | Fusarium poae victorivirus 1                      | 5124                              | NC_030867        |
|              |              | Gremmeniella abietina RNA virus L1                | 5133                              | NC_003876        |
|              |              | Helicobasidium mompa totivirus 1-17 segment L     | 5207                              | NC_005074        |
|              |              | Helicobasidium mompa totivirus 1-17 segment S     | 2096                              | NC_005075        |
|              |              | Helminthosporium victoriae virus 190S             | 5179                              | NC_003607        |
|              |              | Magnaporthe oryzae virus 1                        | 5359                              | NC_006367        |
|              |              | Magnaporthe oryzae virus 2                        | 5193                              | NC_010246        |
|              |              | Magnaporthe oryzae virus 3                        | 5181                              | NC_027209        |
|              |              | Nigrospora oryzae victorivirus 1                  | 5100                              | NC_030224        |
|              |              | Phomopsis vexans RNA virus                        | 5076                              | NC_026135        |
|              |              | Rosellinia necatrix victorivirus 1                | 5329                              | NC_021565        |
|              |              | Sclerotinia nivalis victorivirus 1                | 5162                              | NC_030392        |
|              |              | Sphaeropsis sapinea RNA virus 1                   | 5163                              | NC_001963        |
|              |              | Sphaeropsis sapinea RNA virus 2                   | 5202                              | NC_001964        |
|              |              | Tolypocladium cylindrosporum virus 1              | 5196                              | NC_014823        |
|              |              | Ustilagoidea vires RNA virus 1                    | 5567                              | JX524563         |
|              |              | Ustilagoidea vires RNA virus 1                    | 5220                              | KF791041         |

| virus family                               | virus genus    | virus species                                     | genomic (segment) RNA length (bp)          | Accession number |           |
|--------------------------------------------|----------------|---------------------------------------------------|--------------------------------------------|------------------|-----------|
|                                            |                | Ustilagoidea virens RNA virus 1                   | 5142                                       | NC_020997        |           |
|                                            |                | Ustilagoidea virens RNA virus 3                   | 5075                                       | NC_023547        |           |
|                                            |                | Ustilagoidea virens RNA virus 5                   | 5221                                       | NC_028477        |           |
|                                            |                | Ustilagoidea virens RNA virus L                   | 5654                                       | NC_025366        |           |
|                                            |                | Ustilagoidea virens RNA virus M                   | 2714                                       | NC_025367        |           |
| unclassified                               | Alternavirus   | Fusarium poae alternavirus 1 segment 1            | 3559                                       | NC_030883        |           |
|                                            |                | Fusarium poae alternavirus 1 segment 2            | 2496                                       | NC_030880        |           |
|                                            |                | Fusarium poae alternavirus 1 segment 3            | 2482                                       | NC_030881        |           |
|                                            | Botybirnavirus | Sclerotinia sclerotiorum botybirnavirus 2 RNA 1   | 6159                                       | KT962972         |           |
|                                            |                | Sclerotinia sclerotiorum botybirnavirus 2 RNA 2   | 5872                                       | KT962973         |           |
|                                            | Fusarivirus    | Fusarium poae fusarivirus 1                       | 6379                                       | NC_030868        |           |
|                                            | Megabirnavirus | Rosellinia necatrix megabirnavirus 2-W8 segment 1 | 8985                                       | NC_029125        |           |
|                                            |                | Rosellinia necatrix megabirnavirus 2-W8 segment 2 | 7959                                       | NC_029126        |           |
|                                            |                | Sclerotinia sclerotiorum megabirnavirus 1         | 8806                                       | NC_027221        |           |
|                                            |                | Sclerotinia sclerotiorum megabirnavirus 1         | 7909                                       | NC_027222        |           |
|                                            | Tetramycovirus | Aspergillus fumigatus tetramycovirus-1 RNA 1      | 2403                                       | HG975302         |           |
|                                            |                | Aspergillus fumigatus tetramycovirus-1 RNA 2      | 2233                                       | HG975303         |           |
|                                            |                | Aspergillus fumigatus tetramycovirus-1 RNA 3      | 1970                                       | HG975304         |           |
|                                            |                | Aspergillus fumigatus tetramycovirus-1 RNA 4      | 1131                                       | HG975305         |           |
|                                            | unclassified   |                                                   | Cladosporium cladosporioides virus 1 RNA 1 | 2434             | NC_024704 |
|                                            |                |                                                   | Cladosporium cladosporioides virus 1 RNA 2 | 2241             | NC_024705 |
|                                            |                |                                                   | Cladosporium cladosporioides virus 1 RNA 3 | 2008             | NC_024706 |
|                                            |                |                                                   | Cladosporium cladosporioides virus 1 RNA 4 | 1261             | NC_024707 |
|                                            |                |                                                   | Cladosporium cladosporioides virus 1 RNA 5 | 942              | NC_024708 |
|                                            |                |                                                   | Fusarium graminearum dsRNA mycovirus-1     | 6621             | NC_006937 |
| Fusarium poae dsRNA virus 2                |                |                                                   | 9518                                       | NC_030201        |           |
| Fusarium poae dsRNA virus 3                |                |                                                   | 9419                                       | NC_030202        |           |
| Fusarium poae mycovirus 1                  |                |                                                   | 9148                                       | NC_030869        |           |
| Fusarium poae mycovirus 2                  |                |                                                   | 4224                                       | NC_030870        |           |
| Nigrospora oryzae unassigned RNA virus 1   |                |                                                   | 2857                                       | KT258976         |           |
| Saccharomyces cerevisiae killer virus M1   |                |                                                   | 1801                                       | NC_001782        |           |
| Saccharomyces cerevisiae killer virus Mlus |                |                                                   | 2033                                       | GU723494         |           |
